# Supplementary material for: Persistence of asthma following allergen avoidance is associated with proTh2 myeloid dendritic cell activation
Source: HighWire-hosted journal article supplement (doi:10.1136/thoraxjnl-2014-206364), 2015-06-23
Supplement: thoraxjnl-2014-206364supp.pdf [file thoraxjnl-2014-206364supp.pdf]

## ***Online supplementary material***

### **Persistence of asthma following avoidance of occupational allergens is associated with proTh2 myeloid dendritic cell activation.**

Antoine Froidure

Olivier Vandenplas

Vinciane D'Alpaos

Geneviève Evrard

Charles Pilette

\* These authors contributed equally.

## **Material and methods**

### **Cell staining and analysis**

The following monoclonal antibodies (mAbs) were used for flow cytometry: FITC-conjugated Abs to Lin 1 (CD3, 14, 16, 19, 20, 56) (clones NCAM16.2, MφP9, L27, SJ25C1, 3G8, SK7), CD4 (clone RPA-T4), isotype-matched control IgG (clone MOPC-21, BD Pharmingen, San Diego, CA, USA); PE-conjugated Ab to isotype matched control (clone MOPC-21, BD Pharmingen, San Diego, CA, USA), CD80 (clone L307.4), CD86 (clone 2331 -FUN-1-); PerCP-conjugated Ab to HLA-DR (clone G46-6) and isotype-matched control IgG (clone X39, BD Pharmingen, San Diego, CA, USA); APC-conjugated Ab to CD1c (clone L161, eBioscience, San Diego, CA, USA), CD11c (clone B-ly6); PE-Cy7-conjugated Ab to CD3 (clone HIT3a, Biolegend, San Diego, CA, USA), and isotype-matched control IgG (clone MOPC-21, BD Pharmingen, San Diego, CA, USA).

For immunostaining,  $5-10 \times 10^5$  cells per sample were saturated with a solution of PBS-20% human serum for 30 minutes, to block Fc-receptors. After washes, cells were stained with fluorochrome-labelled antibodies (at concentrations according to manufacturer's guidelines) for 45 minutes at 4°C, and fixed with 0.625 % formaldehyde.

Flow cytometry analysis was performed using a FACS Canto™ II (BD Biosciences, San Diego, CA, USA). At least 10,000 events were read and results were analyzed with Flowjo software vX.0.7 (Tree Star, Ashland, OR, USA).

### **Cytokine assays**

Cytokine levels were assayed in culture supernatants by sandwich ELISA, using paired antibodies for detection of human IL-5 (MAB405 / BAM6051), IL-13 (MAB213 / BAF213) (R&D, Minneapolis, MN USA), IFN- $\gamma$  (MAB2852/BAF285), and IL-10 (BD554705 / BD554499, BD Pharmingen, San Diego, CA, USA). Detection limits were 8 pg/mL for IL-13 and 16 pg/mL for IFN-  $\gamma$ , IL-10 and IL-5.

96-wells plates were coated with capture antibody overnight and then saturated for 1h with PBS containing 1% bovine serum albumin (BSA). After 3 washes with PBS-Tween 20 0.05%, 50  $\mu$ L of each sample were incubated for 2 hours at room temperature. Biotinylated antibodies were added and incubated for 1 hr, and reaction was revealed by adding 50  $\mu$ L of 0.01% streptavidin conjugated with horseradish peroxidase (BD Pharmingen, San Diego, CA, USA) for 30 minutes, followed by TMB (TetraMethylBenzidine, Thermo fisher, Meridian, Rockford, USA). After stopping the reaction with 100 $\mu$ l of 1.8M H<sub>2</sub>SO<sub>4</sub>/well, absorbance was read at 450 nm, using an ELISA microreader (Bio-Rad, Model 3550, Hercules, CA, USA). Concentrations were expressed in pg or ng/mL as referred to recombinant standards.

## Supplementary table

**Table SI: Characteristics of patients for blocking experiments**

| <b>Patients' characteristics (N=7)</b>          |              |
|-------------------------------------------------|--------------|
| Causal allergen, flour/latex                    | 4/3          |
| Gender, M/F                                     | 4/3          |
| Age, years                                      | 47 (39-50)   |
| Atopy (N, %)*                                   | 5 (71)       |
| Current or ex-smokers                           | 2 (28)       |
| Smoking history, pack-years (at follow-up)      | 3, 7         |
| Duration of exposure before removal (months)    | 107 (51-210) |
| Time elapsed since removal from exposure, years | 8 (5-13)     |
