# Supplementary material for: Persistence of asthma following allergen avoidance is associated with proTh2 myeloid dendritic cell activation
Source: HighWire-hosted journal article supplement (doi:10.1136/thoraxjnl-2014-206364), 2015-06-23
Supplement: thoraxjnl-2014-206364supp_figures.pdf [file thoraxjnl-2014-206364supp_figures.pdf]

## Supplementary figures

**Figure S1:** IL-10 and IL-9 production at the end of co-culture between mDCs and allogeneic CD4<sup>+</sup> T 45 cells.

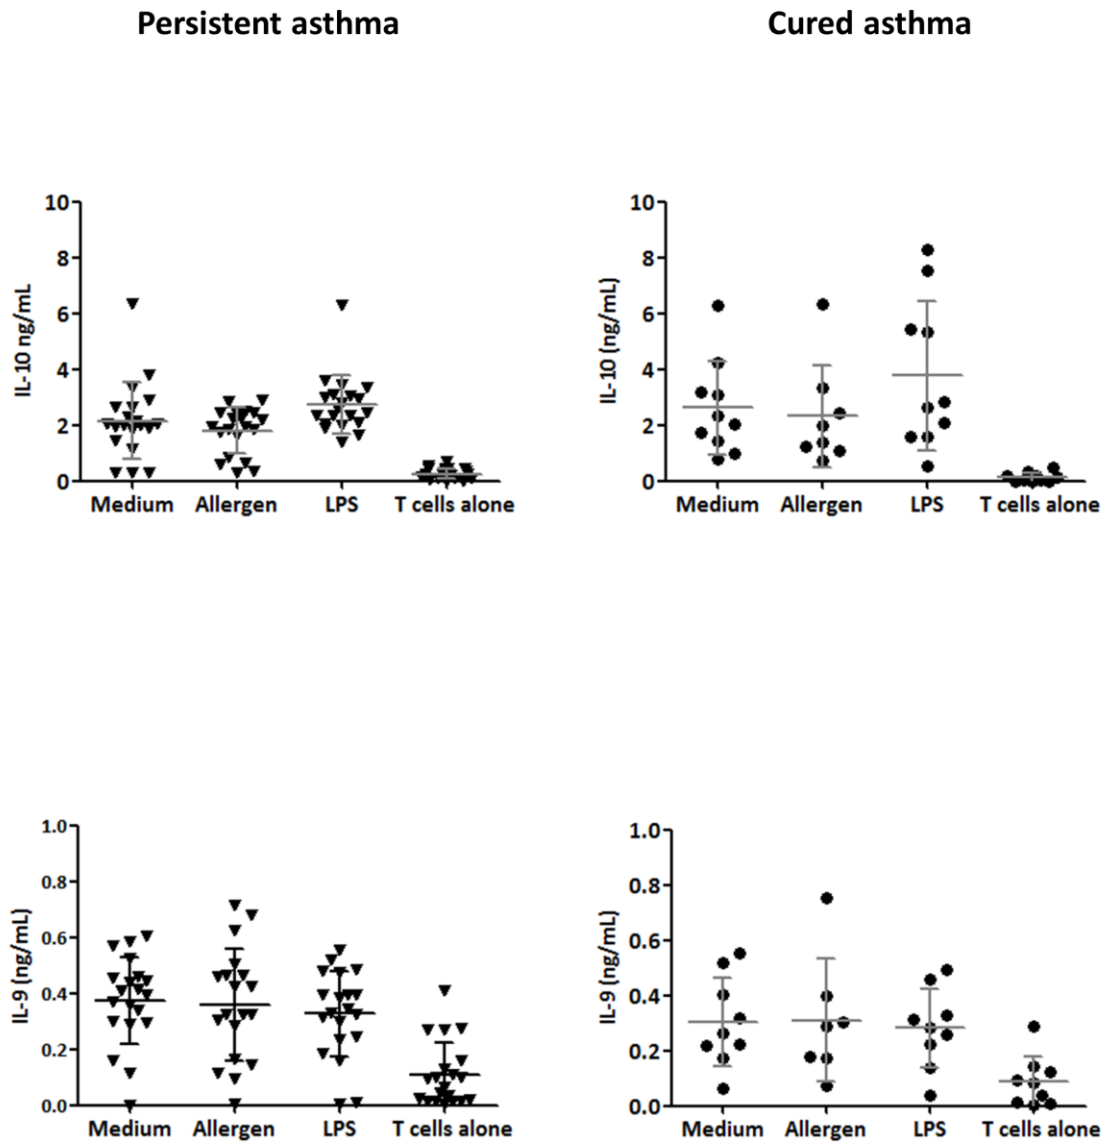

**Figure S1**

**Figure S2:** Flow cytometry analysis of type 1 mDCs. **Panel A:** The purity reaches about 95%, based on the expression of HLA-DR, CD1c, CD11c and the absence of expression of Lin 1 (CD3, 14, 16, 19, 20, 56) cocktail antibodies. **Panel B:** Surface expression of CD80, CD86, PD-L1 and PD-L2 on mDCs from patients with persistent and cured asthma at baseline. There was no significant difference in the level of expression of these markers between patients with persistent or cured asthma.

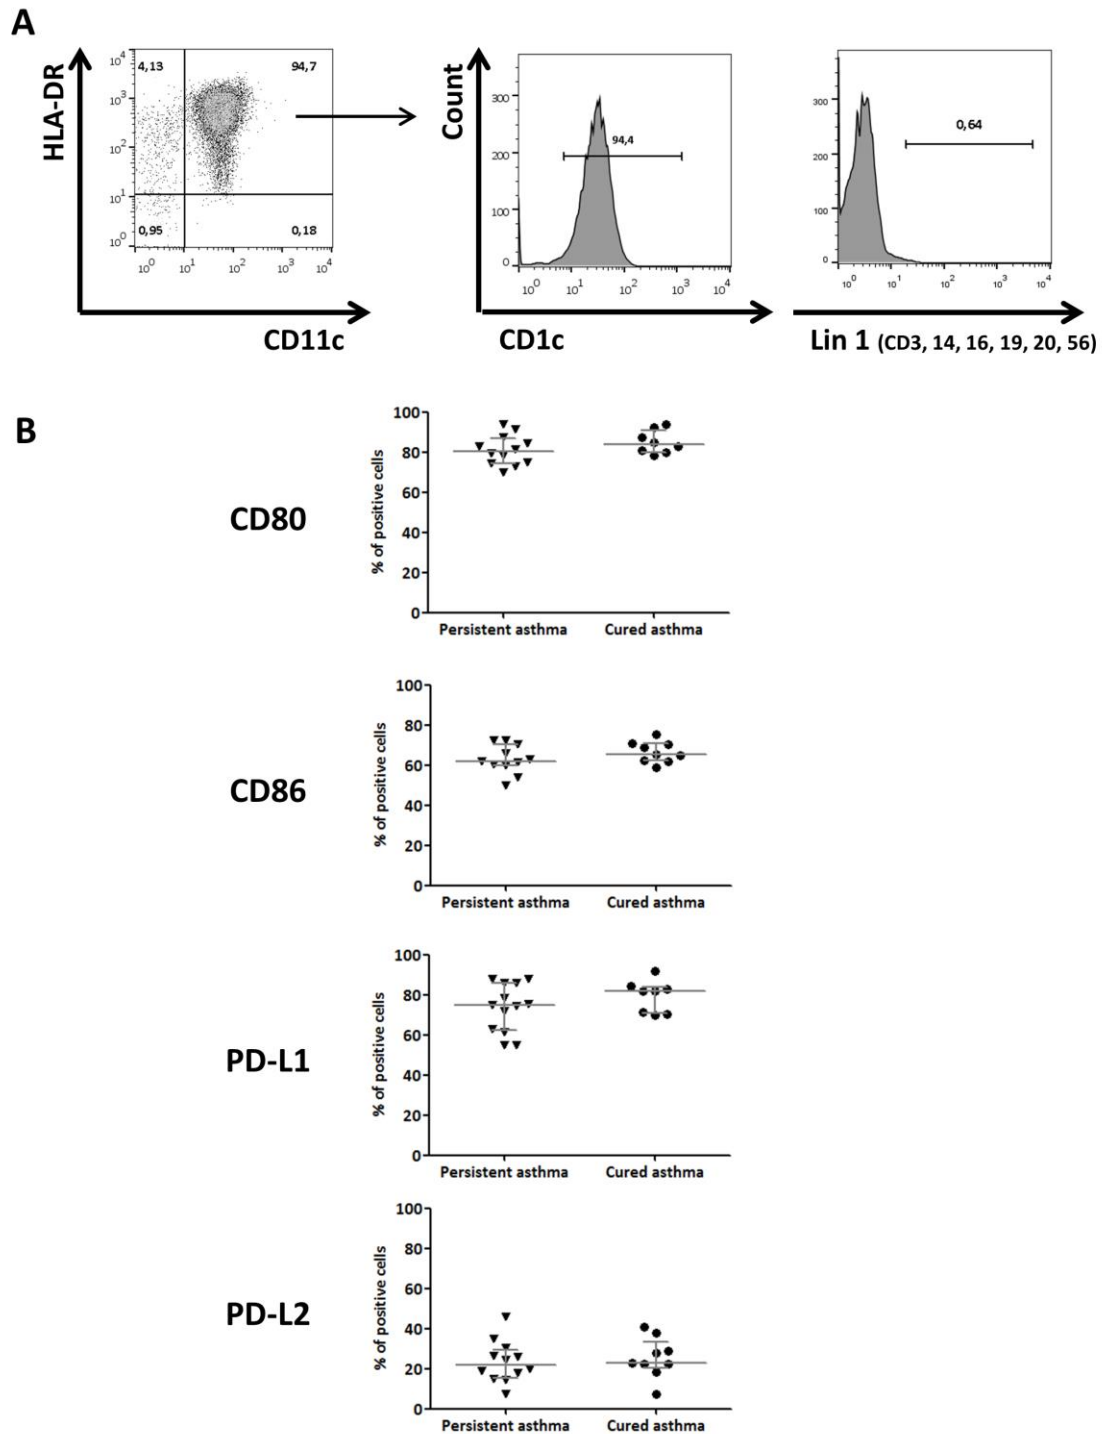

**Figure S2**
